# Supplementary material for: Symptoms and signs of long COVID: A rapid review and meta-analysis
Source: PubMed Central journal article supplement (PMC9125197; doi:10.7189/jogh.12.05014), 2022-05-21

## **Supplementary Material**

### **Appendix S1** Review protocol

We will conduct a rapid literature review of published and unpublished reports. The latter may be important as long COVID is such a rapidly evolving topic. Reports will be selected according to the criteria outlined below.

#### *Study design*

Observational studies will be eligible for inclusion while systematic reviews and meta-analyses will only be used for identifying additional studies.

#### *Participants*

We will include papers that examine adults with long COVID. This is defined as signs or symptoms related to SARS-CoV-2 that are present 4 weeks following suspected or confirmed acute infection.

#### *Timing*

Studies reported between January 2020 to July 2021 will be included in the review. This start date has been chosen because it appears to be the earliest date of publish of a primary long COVID study.

#### *Language*

Only studies reported in English will be included so their relevance and contents can be confirmed by a fluent speaker.

### **Search Methods**

Literature searching will involve medical subject headings (MeSH) and text words related to signs and symptoms of long COVID. We will search four databases: Medline, Embase, MedRxiv and BioRxiv. We will use the search strategy:

1. COVID-19/ or SARS-CoV-2/
2. (covid\* or SARS-CoV-2).tw.
3. or/1-2
4. (long\* or chronic or post\*).tw.
5. Signs and symptoms/
6. (sign\* or symptom\* or present\* or epidemiolog\* or complication\* or impair\* or consequence\*).tw.
7. or/5-6
8. 3 and 4 and 7

Study titles and abstracts will be screened for potential eligibility followed by full text screening to confirm they meet the inclusion criteria. When eligibility is unclear, an additional reviewer will provide guidance.

## Risk of Bias Assessment

A single reviewer will assess the risk of bias of each study using the Joanna Briggs Institute (JBI) checklist for cross-sectional studies. This contains 8 components and results in the decision to either include or exclude the study.

## Data Extraction

Data will be extracted from each study by a single reviewer, using a form designed for this review. It will include demographic information, study type, methodology, results and extra useful information.

## Data Analysis

If enough compatible data are available, meta-analysis will be performed to estimate the prevalence of the signs and symptoms of long COVID. All statistical analyses will be undertaken using R.

## **Appendix S2** Search strategy

1. COVID-19/ or SARS-CoV-2/
2. (covid\* or SARS-CoV-2).tw.
3. or/1-2
4. (long\* or chronic or post\*).tw.
5. Signs and symptoms/
6. (sign\* or symptom\* or present\* or epidemiolog\* or complication\* or impair\* or consequence\*).tw.
7. or/5-6
8. 3 and 4 and 7

**Table S1** Data extraction form

|                  |                                                                                 |                              |                        |               |             |
|------------------|---------------------------------------------------------------------------------|------------------------------|------------------------|---------------|-------------|
| Author           | Country                                                                         | Hospitalisation<br>% (ICU %) | Age                    | Comorbidities | Ethnicity   |
| Timing (days)    | Timing<br>description<br>(after<br>symptom<br>onset/<br>diagnosis/<br>discharge | Sample size                  | Generalised<br>and MSK | Biomarkers    | Respiratory |
| Neuropsychiatric | Sensory<br>specialities                                                         | Gastrointestinal             | Cardiovascular         | Others        |             |

**Table S2** Risk of bias assessment

| Author                 | 1  | 2  | 3 | 4 | 5 | 6 | 7 | 8 | 9  | 10 | 11 | Overall  |
|------------------------|----|----|---|---|---|---|---|---|----|----|----|----------|
| Bellan                 | NA | NA | ✓ | ✓ | ✓ | U | ✓ | ✓ | NA | NA | ✓  | Low      |
| Bliddal                | NA | NA | ✓ | ✓ | ✓ | U | ✓ | ✓ | NA | NA | ✓  | Low      |
| Chiesa-Estomba         | NA | NA | ✓ | ✓ | ✓ | U | ✓ | ✓ | ✓  | X  | ✓  | Low      |
| Cousyn                 | NA | NA | ✓ | ✓ | ✓ | U | ✓ | ✓ | ✓  | U  | ✓  | Low      |
| Daher                  | NA | NA | ✓ | ✓ | X | U | ✓ | ✓ | NA | NA | ✓  | Low      |
| Fernandez-de-Las-Penas | NA | NA | ✓ | ✓ | ✓ | U | ✓ | ✓ | NA | NA | ✓  | Low      |
| Froidure               | NA | NA | ✓ | ✓ | ✓ | U | ✓ | ✓ | NA | NA | ✓  | Low      |
| Gerhards               | NA | NA | ✓ | ✓ | X | U | ✓ | ✓ | X  | U  | ✓  | Moderate |
| Ghosn                  | NA | NA | ✓ | ✓ | ✓ | U | ✓ | ✓ | ✓  | ✓  | ✓  | Low      |
| Han                    | NA | NA | ✓ | ✓ | ✓ | U | ✓ | ✓ | NA | NA | ✓  | Low      |
| Holmes                 | NA | NA | U | X | X | U | U | ✓ | NA | NA | ✓  | High     |
| Jacobs                 | NA | NA | ✓ | ✓ | X | U | X | ✓ | NA | NA | ✓  | Moderate |
| Leth                   | NA | NA | ✓ | ✓ | ✓ | U | ✓ | ✓ | ✓  | NA | ✓  | Low      |
| Mahmud                 | NA | NA | ✓ | ✓ | ✓ | U | ✓ | ✓ | ✓  | NA | ✓  | Low      |
| Otte                   | NA | NA | ✓ | X | X | ✓ | ✓ | ✓ | ✓  | NA | ✓  | Low      |
| Peghin                 | NA | NA | ✓ | ✓ | ✓ | U | U | ✓ | NA | NA | ✓  | Low      |
| Sonnweber              | NA | NA | ✓ | ✓ | ✓ | U | ✓ | ✓ | ✓  | NA | ✓  | Low      |
| Sudre                  | ✓  | ✓  | ✓ | ✓ | ✓ | ✓ | ✓ | ✓ | U  | U  | ✓  | Low      |
| Vaira                  | NA | NA | ✓ | ✓ | ✓ | U | ✓ | ✓ | ✓  | NA | ✓  | Low      |

Abbreviations: ✓, yes; x, no; U, unclear; NA, not applicable.

**Figure S1** Individual forest plots for symptoms and signs included in the meta-analysis

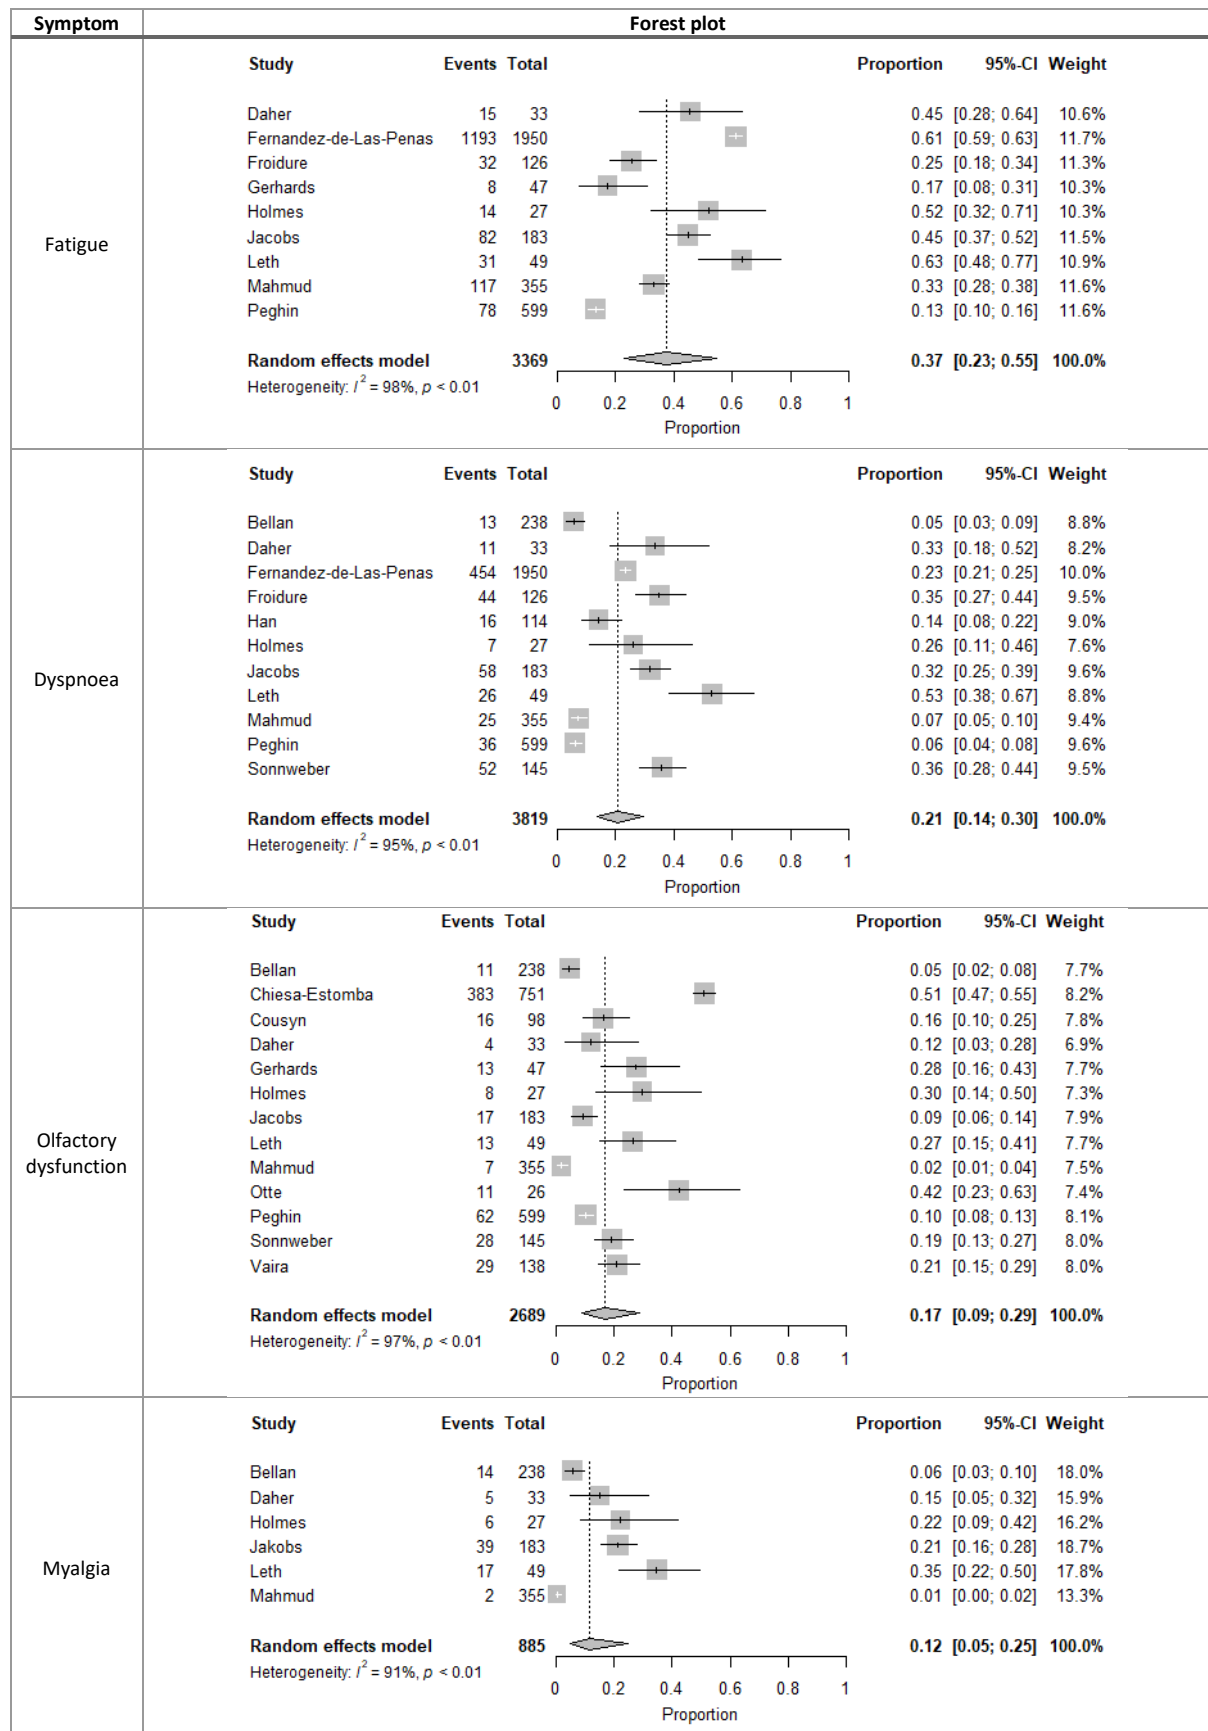

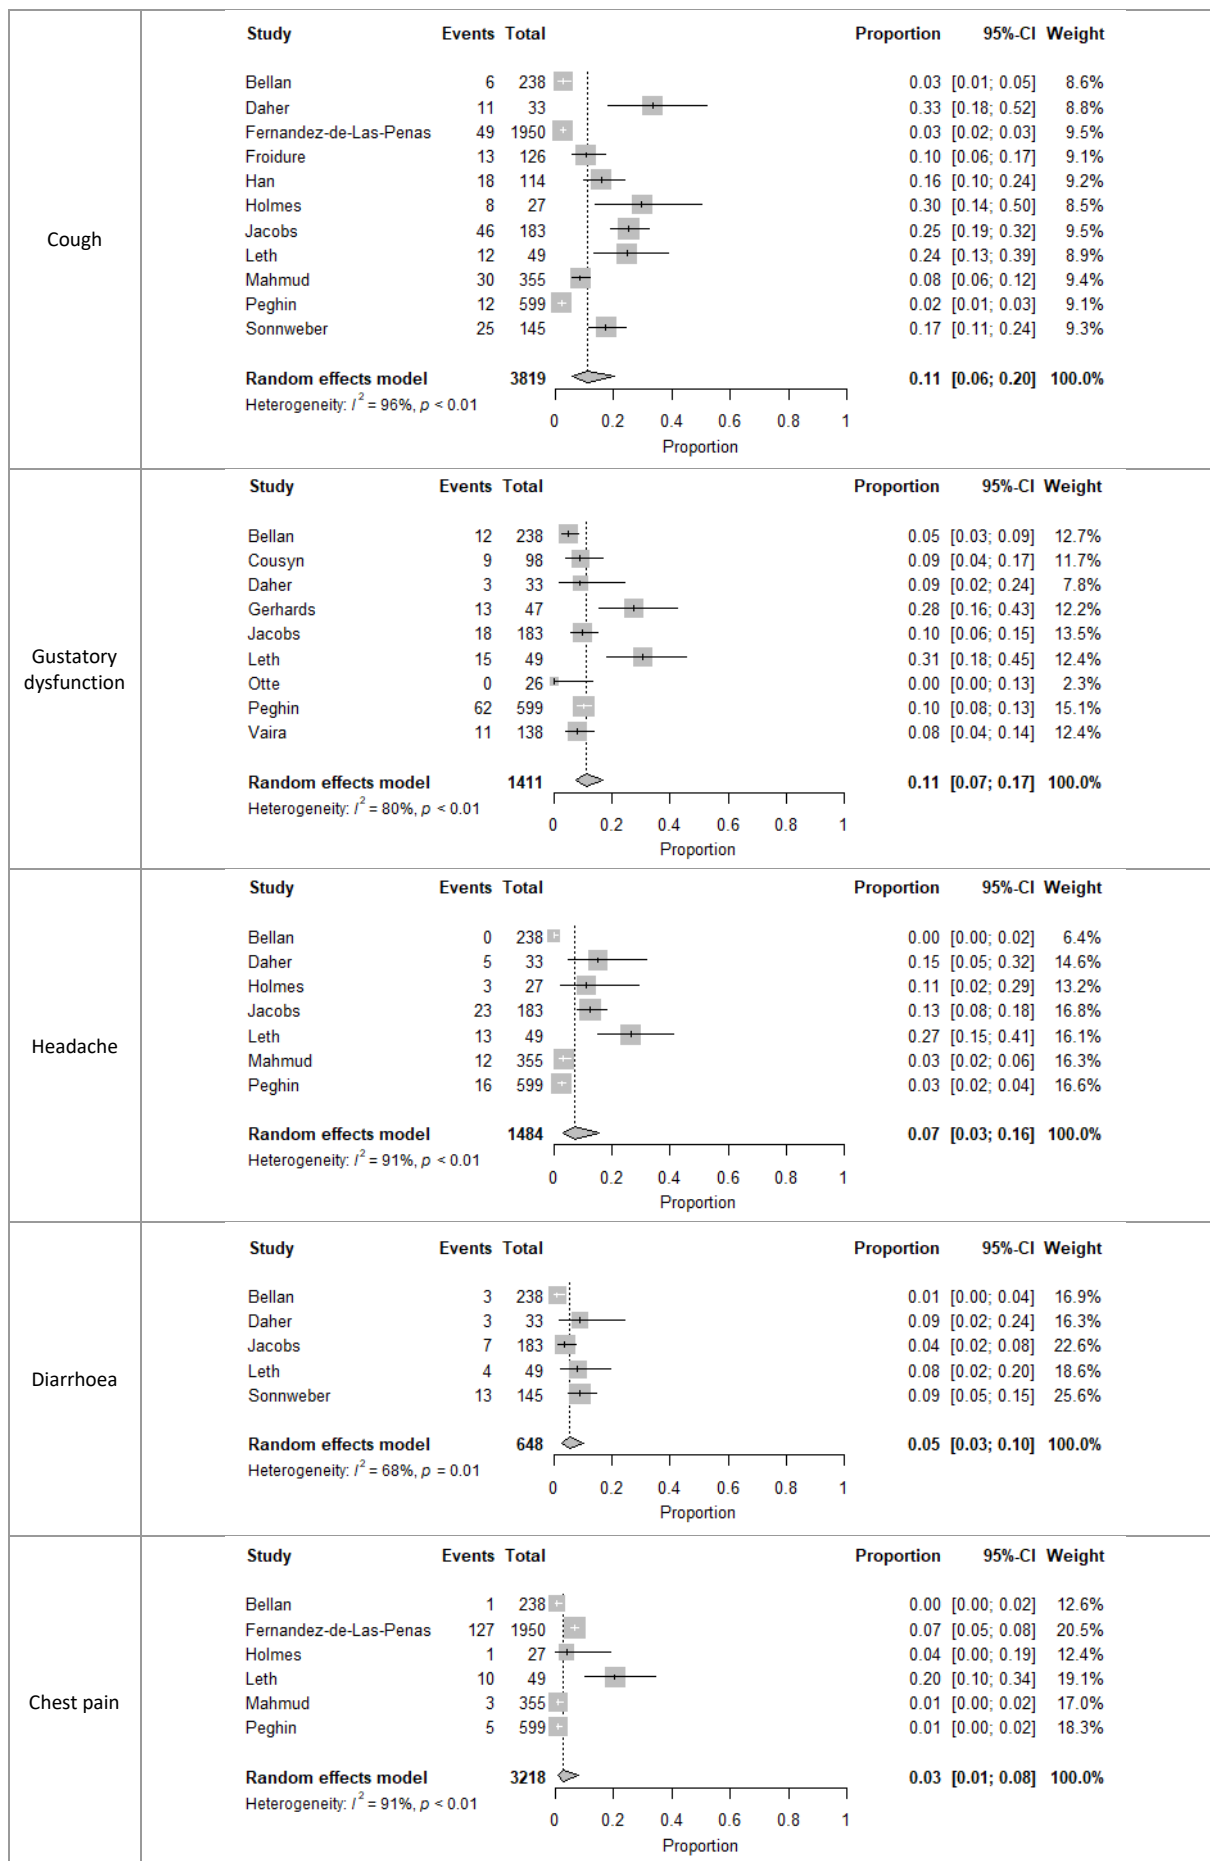

**Table S3** Summarised results for meta-analysis by follow-up time subgroup

| Symptom               | Subgroup (weeks) | Number of studies | Number of patients | Pooled incidence (%) [95% CI] | I <sup>2</sup> (%) | P value |
|-----------------------|------------------|-------------------|--------------------|-------------------------------|--------------------|---------|
| Fatigue               | 4-12             | 2                 | 538                | 38 [28-51]                    | 86                 | 0.92    |
|                       | > 12             | 7                 | 2831               | 37 [18-62]                    | 98                 |         |
| Dyspnoea              | 4-12             | 3                 | 571                | 20 [7-49]                     | 96                 | 0.99    |
|                       | > 12             | 8                 | 3248               | 21 [13-32]                    | 96                 |         |
| Olfactory dysfunction | 4-12             | 6                 | 1558               | 14 [5-35]                     | 98                 | 0.57    |
|                       | > 12             | 7                 | 1131               | 19 [11-31]                    | 90                 |         |
| Myalgia               | 4-12             | 3                 | 571                | 7 [1-32]                      | 93                 | 0.38    |
|                       | > 12             | 3                 | 314                | 17 [5-47]                     | 93                 |         |
| Cough                 | 4-12             | 3                 | 571                | 20 [8-40]                     | 94                 | 0.18    |
|                       | > 12             | 8                 | 3248               | 9 [4-19]                      | 95                 |         |
| Gustatory dysfunction | 4-12             | 4                 | 452                | 9 [4-14]                      | 0                  | 0.36    |
|                       | > 12             | 5                 | 959                | 13 [6-26]                     | 89                 |         |
| Headache              | 4-12             | 3                 | 571                | 9 [3-21]                      | 88                 | 0.60    |
|                       | > 12             | 4                 | 913                | 5 [1-24]                      | 94                 |         |
| Diarrhoea             | 4-12             | 2                 | 216                | 5 [2-12]                      | 39                 | 0.91    |
|                       | > 12             | 3                 | 432                | 5 [2-14]                      | 80                 |         |
| Chest pain            | 4-12             | 1                 | 355                | 1 [0-2]                       | NA                 | 0.09    |
|                       | > 12             | 5                 | 2863               | 3 [1-10]                      | 91                 |         |

Abbreviations: NA, not applicable.

**Figure S2** Individual funnel plots for symptoms and signs included in the meta-analysis

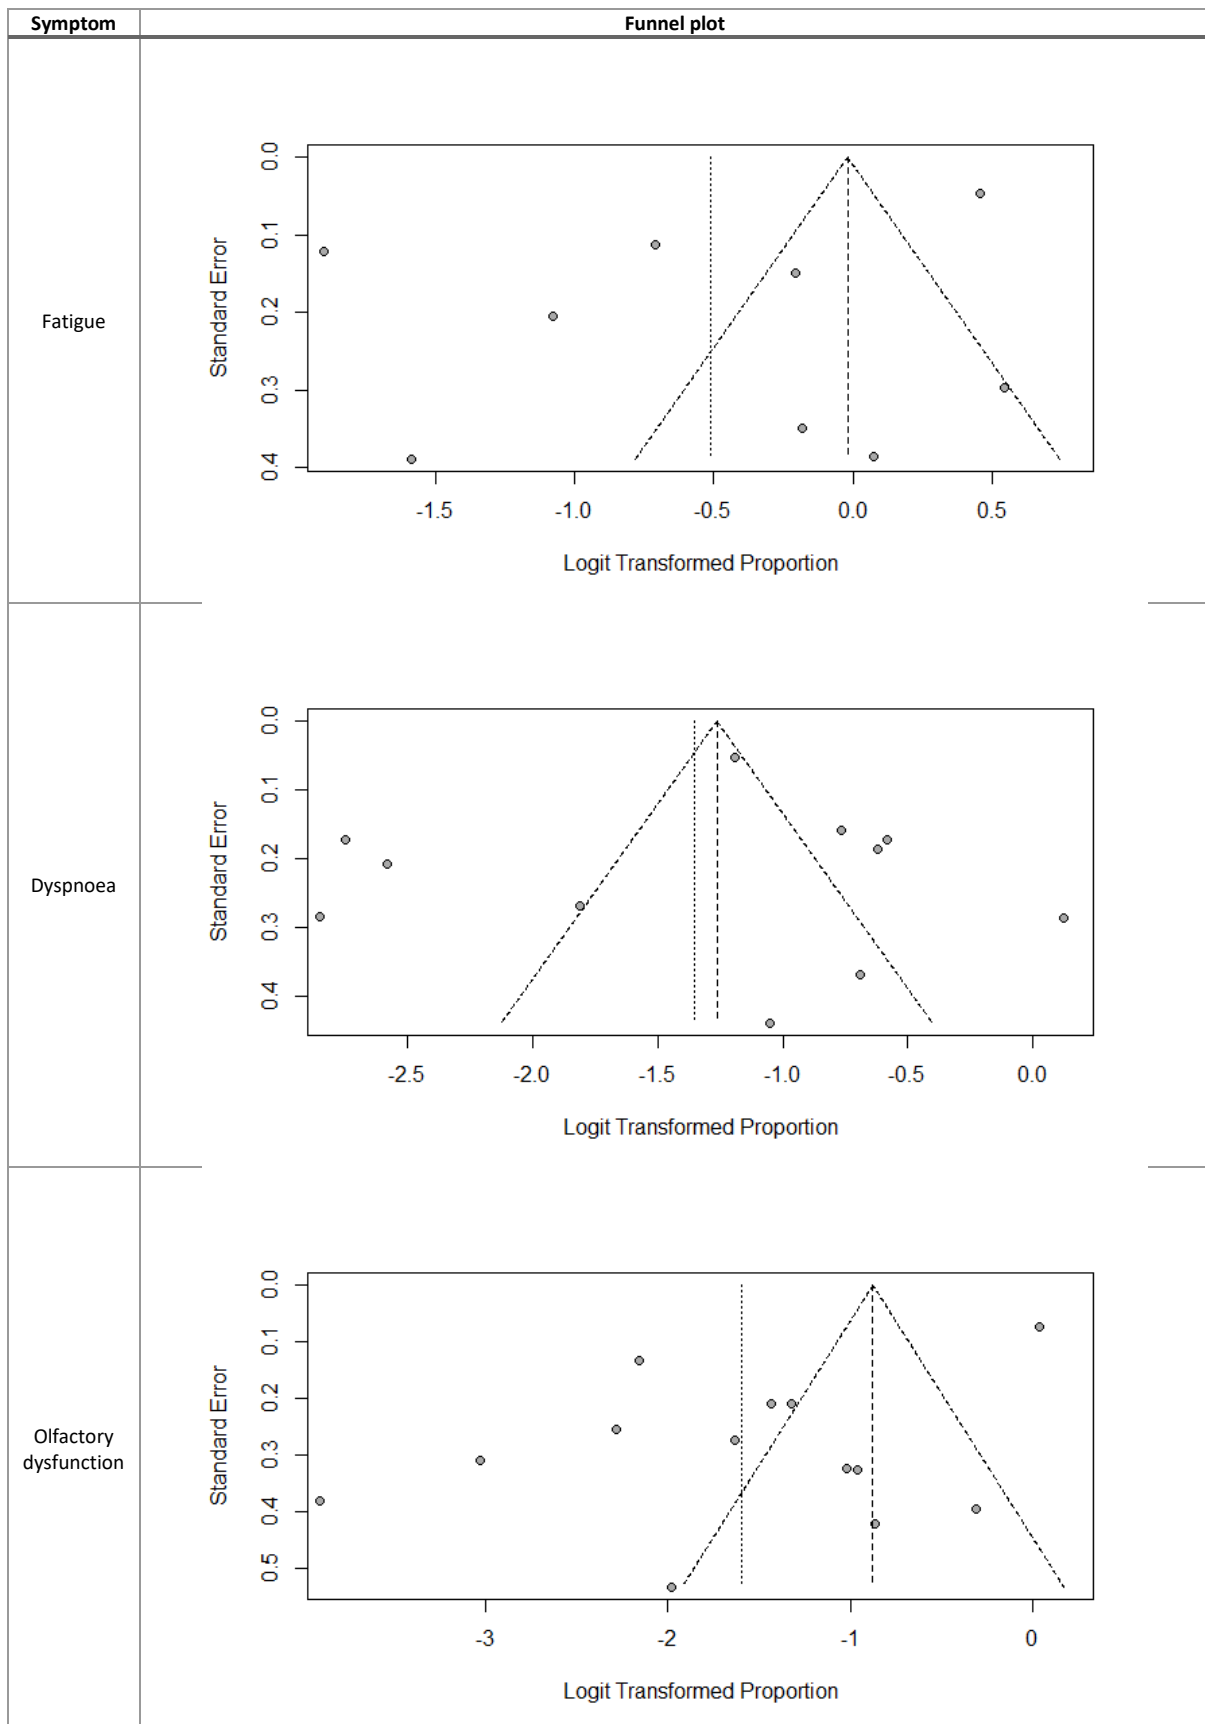

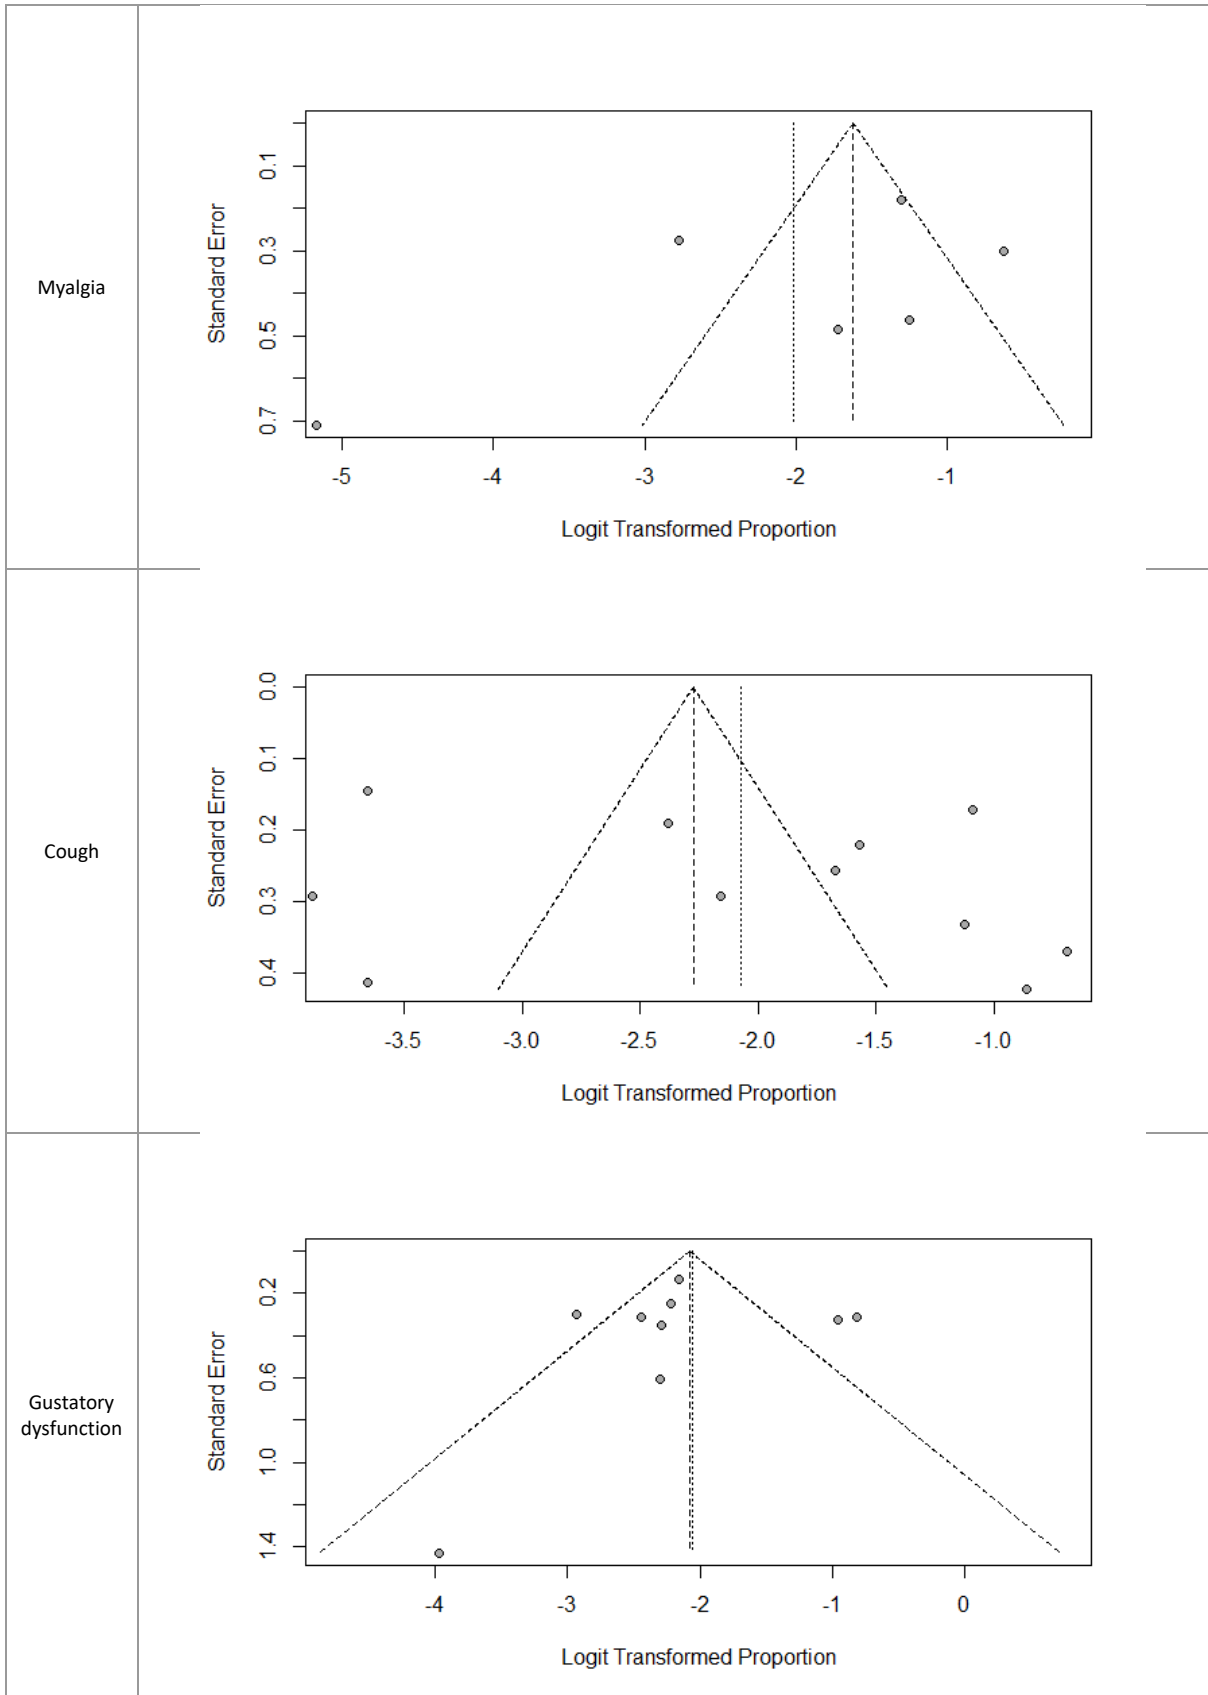



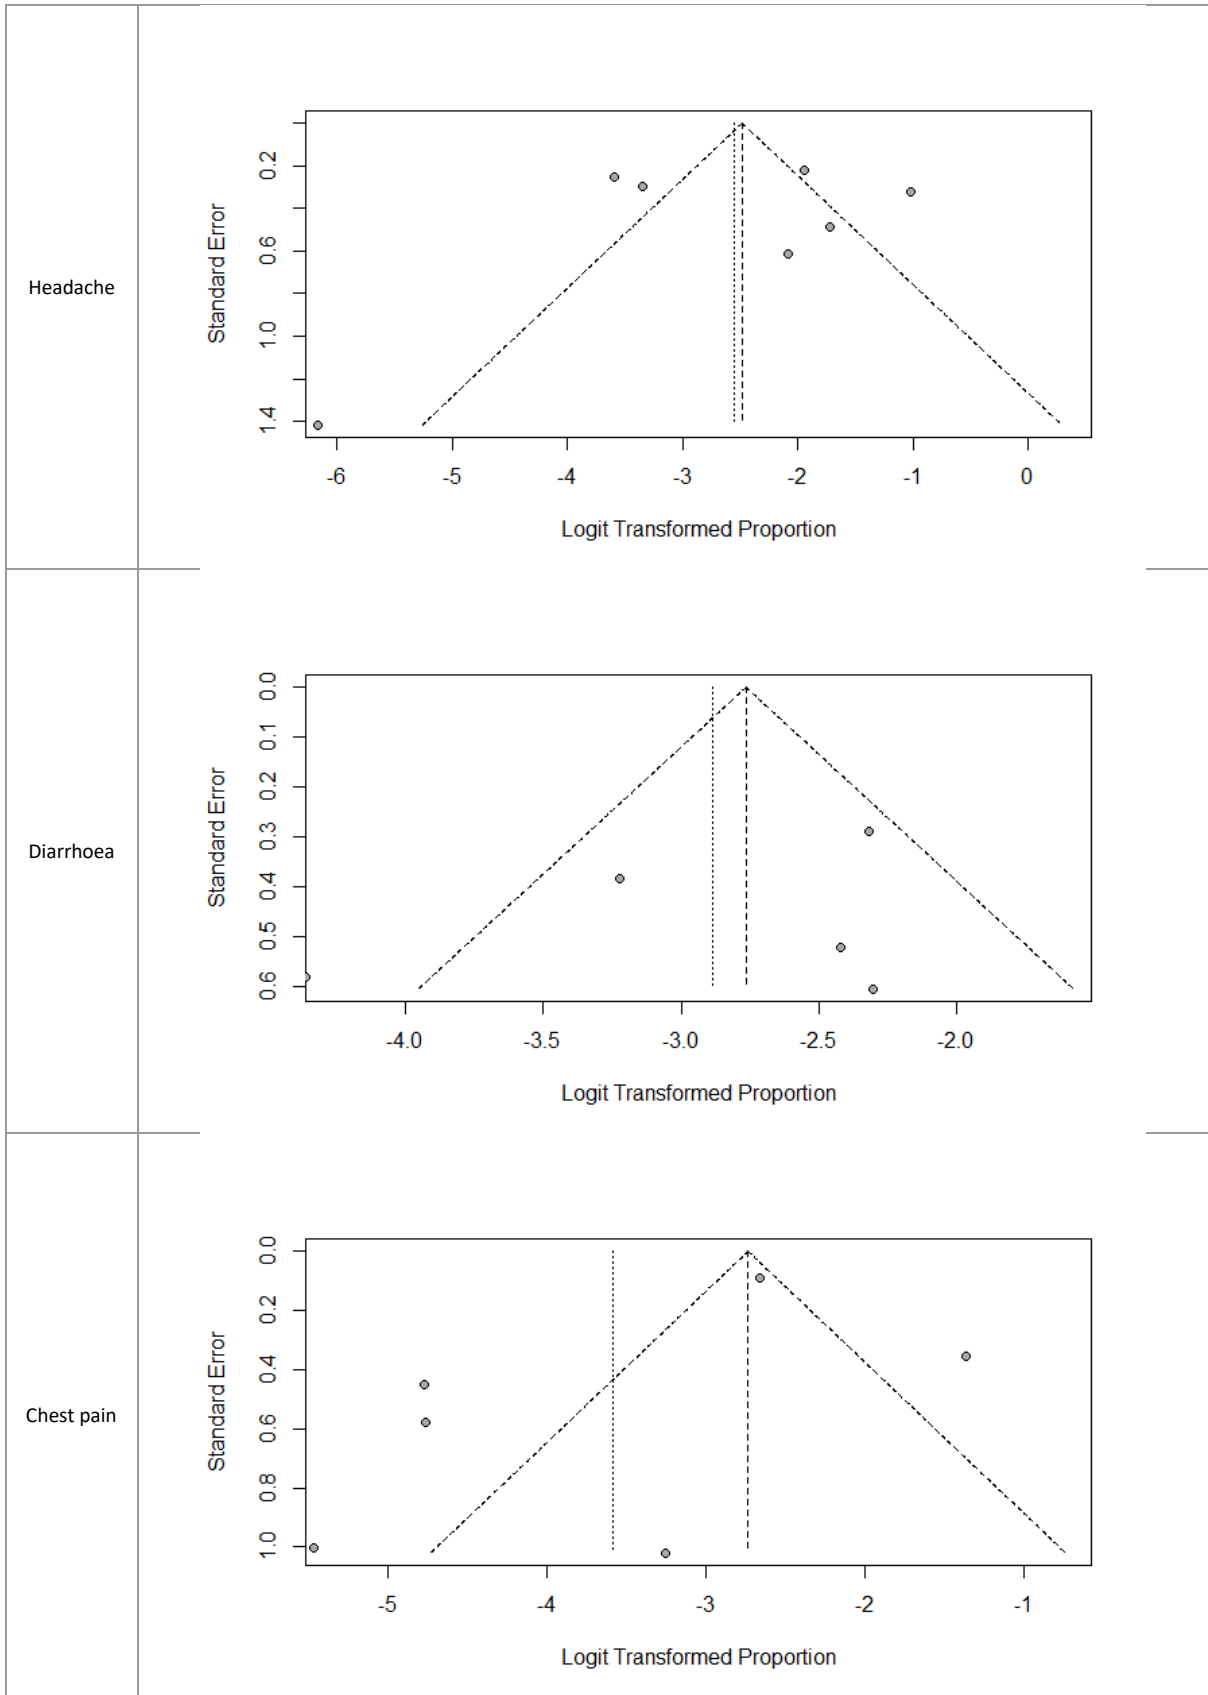

Supplement: jogh-12-05014-s001.pdf [file jogh-12-05014-s001.pdf]
